# Supplementary material
Source: MDPI journal article supplement (https://www.mdpi.com/1999-4907/9/2/64)
Supplement: s1 [file s1]

Supplementary material for the manuscript

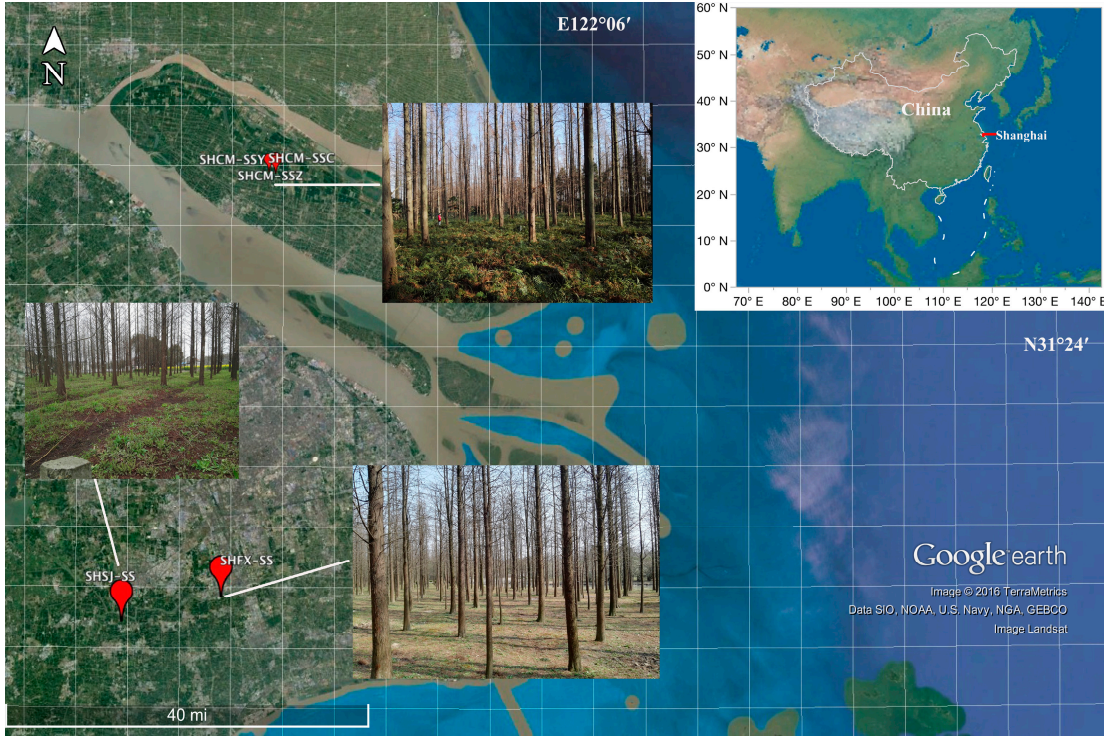

Figure S1 Study area of *M. glyptostroboides* plantations in SUFRN in Shanghai

Table S1 Description of *M. glyptostroboides* plantations plots in SUFRN

| ID | County    | Longitude    | Latitude    | SI<br>(m) | Area<br>(ha) | 2016          |             |               |                                        | 2011          |             |               |                                         |
|----|-----------|--------------|-------------|-----------|--------------|---------------|-------------|---------------|----------------------------------------|---------------|-------------|---------------|-----------------------------------------|
|    |           |              |             |           |              | Age<br>(year) | DBH<br>(cm) | Height<br>(m) | Density<br>(stem<br>ha <sup>-1</sup> ) | Age<br>(Year) | DBH<br>(cm) | Height<br>(m) | Density<br>(trees<br>ha <sup>-1</sup> ) |
| 1  | Fengxian  | 121°22'52.25 | 30°59'04.96 | 12        | 0.06         | 17            | 10.2        | 10            | 3550                                   | 12            | 8.6         | 8.5           | 3550                                    |
| 2  | Fengxian  | 121°22'52.24 | 30°59'03.78 | 16        | 0.06         | 17            | 10.4        | 13            | 2617                                   | 12            | 8.5         | 9.8           | 3017                                    |
| 3  | Fengxian  | 121°22'51.32 | 30°59'02.36 | 14        | 0.06         | 17            | 11.5        | 13.3          | 2483                                   | 12            | 9.4         | 9.8           | 2767                                    |
| 4  | Songjiang | 121°19'06.58 | 30°94'31.18 | 10        | 0.06         | 23            | 19.1        | 14            | 933                                    | 18            | 14.6        | 11            | 967                                     |
| 5  | Songjiang | 121°19'04.75 | 30°94'31.05 | 10        | 0.06         | 23            | 18.2        | 14            | 1133                                   | 18            | 13.7        | 12.5          | 1133                                    |
| 6  | Songjiang | 121°19'02.30 | 30°94'31.00 | 10        | 0.06         | 23            | 16.9        | 14            | 1200                                   | 18            | 12.8        | 10.8          | 1500                                    |
| 7  | Chongming | 121°09'04.20 | 31°04'32.60 | 22        | 0.1          | 16            | 26.5        | 14.5          | 440                                    | 11            | 22.3        | 14.5          | 440                                     |
| 8  | Chongming | 121°09'04.19 | 30°04'32.50 | 22        | 0.1          | 16            | 19.4        | 13.5          | 880                                    | 11            | 15.8        | 10.1          | 880                                     |
| 9  | Chongming | 121°29'04.39 | 31°41'11.78 | 22        | 0.1          | 16            | 15.2        | 12            | 900                                    | 11            | 12.1        | 9.6           | 900                                     |
| 10 | Chongming | 121°29'06.17 | 31°41'26.82 | 12        | 0.1          | 25            | 21.8        | 20.7          | 760                                    | 20            | 20.7        | 17.5          | 760                                     |
| 11 | Chongming | 121°29'07.74 | 31°41'26.68 | 12        | 0.1          | 25            | 24.3        | 18            | 410                                    | 20            | 21.5        | 17.4          | 440                                     |
| 12 | Chongming | 121°29'06.39 | 31°41'26.48 | 12        | 0.1          | 25            | 22.7        | 17.7          | 640                                    | 20            | 20.4        | 16.4          | 640                                     |
| 13 | Chongming | 121°28'18.00 | 31°41'21.00 | 14        | 0.1          | 35            | 29.1        | 29            | 480                                    | 30            | 27.4        | 27            | 510                                     |
| 14 | Chongming | 121°28'21.00 | 31°41'19.00 | 16        | 0.1          | 35            | 30.7        | 29.3          | 410                                    | 30            | 28.7        | 28.4          | 440                                     |
| 15 | Chongming | 121°28'21.00 | 31°41'12.00 | 14        | 0.1          | 35            | 30.2        | 28.1          | 440                                    | 30            | 28.3        | 26.5          | 440                                     |

Table S2 The observed values for model evaluation

| Stemwood biomass (Mg ha <sup>-1</sup> ) |          |                   | DBH (cm) |          |                       | Top height (m) |          |                   |
|-----------------------------------------|----------|-------------------|----------|----------|-----------------------|----------------|----------|-------------------|
| Age                                     | Observed | Source            | Age      | Observed | Source                | Age            | Observed | Source            |
| 6                                       | 1.1      | Fang et al., 1995 | 7        | 11.1     | Gao et al.,1992       | 7              | 6.8      | Gao et al.,1992   |
| 6                                       | 1.8      | Fang et al., 1995 | 7        | 9.5      | Gao et al.,1992       | 7              | 8.9      | Gao et al.,1992   |
| 6                                       | 2.4      | Fang et al., 1995 | 8        | 7.3      | Xiao et al., 2010     | 8              | 5.4      | Xiao et al., 2010 |
| 8                                       | 7.2      | Xiao et al., 2010 | 11       | 15.8     | SUFRN                 | 11             | 14.5     | SUFRN             |
| 8                                       | 6.4      | Fang et al., 1995 | 11       | 12.1     | SUFRN                 | 11             | 10.1     | SUFRN             |
| 8                                       | 8.9      | Fang et al., 1995 | 12       | 16.6     | Gao et al.,1992       | 11             | 9.6      | SUFRN             |
| 8                                       | 10.9     | Fang et al., 1995 | 12       | 11.4     | Gao et al.,1992       | 12             | 11.4     | Gao et al.,1992   |
| 10                                      | 21.4     | Fang et al., 1995 | 12       | 8.6      | SUFRN                 | 12             | 12.3     | Gao et al.,1992   |
| 10                                      | 22.6     | Fang et al., 1995 | 12       | 8.5      | SUFRN                 | 12             | 8.5      | SUFRN             |
| 10                                      | 26.1     | Fang et al., 1995 | 12       | 9.4      | SUFRN                 | 12             | 9.8      | SUFRN             |
| 11                                      | 48.5     | SUFRN             | 15       | 16.3     | Xiao et al., 2010     | 12             | 9.8      | SUFRN             |
| 11                                      | 38.8     | SUFRN             | 16       | 19.4     | SUFRN                 | 15             | 15.0     | Xiao et al., 2010 |
| 11                                      | 19.5     | SUFRN             | 16       | 15.2     | SUFRN                 | 16             | 14.5     | SUFRN             |
| 12                                      | 31.0     | SUFRN             | 17       | 10.2     | SUFRN                 | 16             | 13.5     | SUFRN             |
| 12                                      | 30.6     | SUFRN             | 17       | 10.4     | SUFRN                 | 16             | 12.0     | SUFRN             |
| 12                                      | 25.5     | SUFRN             | 17       | 11.5     | SUFRN                 | 17             | 10.0     | SUFRN             |
| 12                                      | 36.3     | Fang et al., 1995 | 18       | 19.5     | Gao et al.,1992       | 17             | 13.0     | SUFRN             |
| 12                                      | 32.7     | Fang et al., 1995 | 18       | 14.6     | SUFRN                 | 17             | 13.3     | SUFRN             |
| 12                                      | 41.5     | Fang et al., 1995 | 18       | 13.7     | SUFRN                 | 18             | 14.4     | Gao et al.,1992   |
| 12                                      | 68.5     | Gao et al., 1992  | 18       | 12.8     | SUFRN                 | 18             | 16.3     | Gao et al.,1992   |
| 14                                      | 51.5     | Fang et al., 1995 | 20       | 12.4     | Williams et al., 2003 | 18             | 11.0     | SUFRN             |
| 14                                      | 43.9     | Fang et al., 1995 | 20       | 12.4     | Williams et al., 2003 | 18             | 12.5     | SUFRN             |

|    |       |                   |    |      |                       |    |      |                       |
|----|-------|-------------------|----|------|-----------------------|----|------|-----------------------|
| 14 | 55.8  | Fang et al., 1995 | 20 | 20.7 | SUFRN                 | 18 | 10.8 | SUFRN                 |
| 15 | 50.6  | Xiao et al., 2010 | 20 | 21.5 | SUFRN                 | 20 | 18.0 | Williams et al., 2003 |
| 16 | 76.7  | SUFRN             | 20 | 20.4 | SUFRN                 | 20 | 18.0 | Williams et al., 2003 |
| 16 | 66.9  | SUFRN             | 23 | 19.1 | SUFRN                 | 20 | 17.5 | SUFRN                 |
| 16 | 35.8  | SUFRN             | 23 | 18.2 | SUFRN                 | 20 | 17.4 | SUFRN                 |
| 17 | 48.8  | SUFRN             | 23 | 16.9 | SUFRN                 | 20 | 16.4 | SUFRN                 |
| 17 | 47.0  | SUFRN             | 25 | 21.8 | SUFRN                 | 22 | 15.7 | Gao et al., 1992      |
| 17 | 37.9  | SUFRN             | 25 | 24.3 | SUFRN                 | 23 | 18.1 | SUFRN                 |
| 18 | 34.5  | SUFRN             | 25 | 22.7 | SUFRN                 | 23 | 18.5 | SUFRN                 |
| 18 | 34.1  | SUFRN             | 30 | 18.3 | Chi, 2013             | 23 | 18.0 | SUFRN                 |
| 18 | 37.7  | SUFRN             | 30 | 26.9 | Xiao et al., 2010     | 25 | 20.7 | SUFRN                 |
| 18 | 110.7 | Gao et al., 1992  | 30 | 27.4 | SUFRN                 | 25 | 18.0 | SUFRN                 |
| 20 | 68.7  | SUFRN             | 30 | 28.7 | SUFRN                 | 25 | 17.7 | SUFRN                 |
| 20 | 44.0  | SUFRN             | 30 | 28.3 | SUFRN                 | 27 | 24.7 | Xie, 2007             |
| 20 | 55.6  | SUFRN             | 32 | 17.9 | Xie, 2007             | 30 | 24.3 | Chi, 2013             |
| 23 | 68.0  | SUFRN             | 35 | 29.1 | SUFRN                 | 30 | 22.5 | Xiao et al., 2010     |
| 23 | 72.7  | SUFRN             | 35 | 30.7 | SUFRN                 | 30 | 27.0 | SUFRN                 |
| 23 | 63.2  | SUFRN             | 35 | 30.2 | SUFRN                 | 30 | 28.4 | SUFRN                 |
| 30 | 97.1  | SUFRN             | 41 | 27.1 | Williams et al., 2003 | 30 | 26.5 | SUFRN                 |
| 30 | 91.3  | SUFRN             | 41 | 27.1 | Williams et al., 2003 | 32 | 17.4 | Xie, 2007             |
| 30 | 94.8  | SUFRN             | 47 | 24.4 | Williams et al., 2003 | 35 | 33.1 | SUFRN                 |
| 30 | 137.2 | Xiao et al., 2010 | 47 | 24.4 | Williams et al., 2003 | 35 | 34.0 | SUFRN                 |
| 30 | 144.5 | Chi, 2013         | 48 | 25.1 | Williams et al., 2003 | 35 | 35.0 | SUFRN                 |
| 32 | 198.6 | Xie, 2007         | 48 | 25.1 | Williams et al., 2003 | 41 | 27.3 | Williams et al., 2003 |
| 35 | 107.3 | SUFRN             |    |      |                       | 41 | 27.3 | Williams et al., 2003 |
| 35 | 108.6 | SUFRN             |    |      |                       | 44 | 31.5 | Williams et al., 2003 |

|    |       |       |    |      |                       |
|----|-------|-------|----|------|-----------------------|
| 35 | 105.7 | SUFRN | 44 | 31.5 | Williams et al., 2003 |
|    |       |       | 47 | 28.6 | Williams et al., 2003 |
|    |       |       | 47 | 28.6 | Williams et al., 2003 |
|    |       |       | 48 | 30.7 | Williams et al., 2003 |
|    |       |       | 48 | 31.1 | Williams et al., 2003 |
|    |       |       | 48 | 30.7 | Williams et al., 2003 |
|    |       |       | 48 | 31.1 | Williams et al., 2003 |

---

## **The FORECAST model**

FORECAST is a deterministic, management-oriented, stand-level forest growth and ecosystem dynamics simulator, which operates at annual time steps. The model simulates the dynamics of all forest carbon stocks required under the Kyoto Protocol (aboveground biomass, belowground biomass, litter, dead wood and soil organic carbon). It complies with the carbon estimation methods outlined by the IPCC (Penman et al. 2003). The model was designed to compare and contrast different management effects on forest productivity, stand dynamics and a series of biophysical indicators of non-timber values. The projection of stand growth and ecosystem dynamics is based on a representation of the rates of key ecological processes regulating the availability of, and competition for, light and nutrient resources. The rates of these processes are calculated from a combination of historical bioassay data (biomass accumulation in component pools, stand density, etc.) and measures of certain ecosystem variables (e.g., decomposition rates, photosynthetic saturation curves) by relating biologically active components (foliage and small roots) with calculations of nutrient uptake, capture of light, and net primary production (Blanco and González, 2010; Wang *et al.*, 2013).

Using this internal calibration or hybrid approach, the model generates a suite of growth properties for each tree and plant species to be represented. These growth properties are subsequently used as a function of resource availability and competition. They include (but are not limited to) (1) photosynthetic efficiency per unit foliage biomass based on relationships between foliage biomass, simulated self-shading and net primary productivity after accounting for litterfall and mortality, (2) nutrient uptake requirements based on rates of biomass accumulation and literature- or field-based measures of nutrient concentrations in different biomass components at site of different qualities, and (3) light-related measures of tree and branch mortality derived from stand density input data in combination with simulated light profiles. Light levels at which foliage and tree mortality occur are estimated for each species. The model uses a mass balance approach to estimate how nutrients circulate in the ecosystem, and how their availability limits vegetation growth (trees, plants and bryophytes) together with available light in the canopy. Detailed descriptions of decomposition, tree uptake and biogeochemical cycles have been described before (Kimmins 1993, Kimmins et al. 1999,

2010).

Projection of stand growth and ecosystem dynamics is based upon a system of equations that links the rates of key ecological processes regulating the availability of, and competition for, light and nutrient resources with vegetation growth. The rates of these processes are calculated from a combination of historical bioassay data (biomass accumulation in component pools, stand density, etc., see (Kimmins et al. 1999) for a detailed description of input parameters needed) and measures of certain ecosystem variables (e.g. decomposition rates, photosynthetic saturation curves, etc.) by relating biologically active components (foliage and small roots) with calculations of nutrient uptake, capture of light, and net primary production. With the calibration data obtained from different sources, the model calculates the annual rates of different ecological processes (tree growth, litterfall production, mortality, etc.) that should had happened to produce the observed data on tree growth and density provided by the user. Therefore, for each plant species for which historical data are provided, the total net primary production (TNPP) that occurred for each annual time step ( $t$ ) is calculated with Equation (1).

$$\text{TNPP}_t = \Delta\text{biomasst} + \text{litterfall}_t + \text{mortality}_t \quad (1)$$

where  $\Delta\text{biomasst}$  = the sum of the change in mass of all the biomass components of the particular species in time step  $t$ ;  $\text{litterfall}_t$  = the sum of the mass of all ephemeral tissues that are lost in time step  $t$  (e.g., leaf, branch, bark and reproductive litterfall, and root death); and  $\text{mortality}_t$  = the mass of plants that die in time step  $t$ . Change in biomass ( $\Delta\text{biomasst}$ ) in each time step is derived from a series of age–biomass curves created with empirical data (see a detailed description of the process in [Kimmins et al. 1999]). Litterfall is calculated using user-defined values based on empirical litterfall rates. For trees, mortality is derived from a series of age–stand density curves created with empirical data (for detailed descriptions on litterfall and mortality simulations in FORECAST, see (Kimmins 1993, Kimmins et al. 1999). For trees, mortality is calibrated

through two different parameters: curves of historical stand density for different ages and the proportion of mortality that is due to non-interspecific competition factors. Together, both parameters allow simulating the endemic, low level mortality events caused by pests and diseases typical of coniferous forests. For plants (grasses and crops in these simulations) mortality is not simulated explicitly as no individual plants are simulated, but it is assumed to be included in the curves of biomass per area and age.

The model also estimates the Shade-Corrected Foliage N content (SCFN), which represents the amount of N in fully illuminated foliage that was required to produce the calculated historical TNPP, based on the empirical data. To estimate foliage shading, FORECAST simulates canopy foliage biomass as a “blanket” that covers the stand and that is divided in several layers of 0.25 m height, each of them increasingly darker from the top to the bottom of the canopy. Tree, understory, grasses or crop canopies are therefore simulated in the same way. The light absorbed by each layer is calculated based on the foliage biomass present in each time step and a user-defined empirical curve of foliage mass-proportion of full light (light absorption by foliage). Once an estimation of self-shading has been completed for a particular time step using the method described above, FORECAST calculates the equivalent N content after correcting for self-shading (SCFN, Equations 2 and 3).

$$SCFN_t = \sum_{i=1}^n (FN_{t,i} \times PLSC_i) \quad (2)$$

$$FN_{t,i} = \text{foliage biomass}_{t,i} \times \text{foliar N concentration} \quad (3)$$

Where  $FN_{t,i}$  = mass of foliage N in the  $i$ th quarter-meter height increment in the live canopy at time  $t$ ,  $PLSC_i$  = photosynthetic light saturation curve value for the associated light level in the  $i$ th quarter-meter height increment in the live canopy,  $n$  = number of quarter-meter height increments in the live canopy at time  $t$ . The mean photosynthetic rate of the foliage in canopy level  $i$  is calculated by combining simulated light intensities in canopy level  $i$  with input data that define photosynthetic light saturation curves for the foliage type in question. Finally, the driving



function curve for potential growth of a given species in FORECAST is the Shade-Corrected Foliar N Efficiency (SCFNE) calculated for each annual time step (t) with Equation 4:

$$\text{SCFNE}_t = \text{TNPP}_t / \text{SCFN}_t \quad (4)$$

When data describing the growth of a species on more than one site quality (defined as the combination of nutrient availability and climate conditions for a specific site, see [Kimmins 1993, Kimmins et al. 1999]) are provided, SCFNE function curves will be generated during the calibration stage for each site quality. To calculate the nutritional aspects of tree and plant growth, FORECAST requires data on nutrient concentration in each different tree organ. Nutrient dynamics in this study were restricted to N, the most limiting nutrient at these sites (Wei et al. 2012).

Net primary production in FORECAST is allocated among the different organs in the same ratios as the input data on biomass accumulation curves for each organ. If data are given for sites that differ in productivity, the model will simulate changing resource allocation strategies as the simulated nutritional site quality varies during a run of the model. Thus, empirically-observed variations in production allocation strategies on sites of different nutritional quality are used to guide the simulation of changing production allocation in response to simulated changes in nutritional site quality during the simulations.

Kimmins et al. (Kimmins et al. 2008) have shown how the combination of light and nutrient limitation is not enough to explain complex ecological patterns in simulated models, and they recommended including also understory vegetation. Therefore, a comparable but simpler (e.g. no data on bark, wood, mortality, etc.) set of data for understory vegetation must be provided to represent this ecosystem component. Lastly, data describing decomposition rates for various litter and humus types are required to simulate nutrient cycling. Decomposition rates are defined by

the user (using values from empirical studies) and are affected by site quality, which in turn is defined depending on nutrient and water availability (Kimmins 1993, Kimmins et al. 1999). Litter is composed by a collection of different litter cohorts, each with its age and decomposition stage. Snags and logs are tracked by placing them into different categories depending on their original sizes (with slower decomposition rates for snags and for stems with larger sizes).

## References

- Blanco, J. A., González, E., 2010. Exploring the Sustainability of Current Management Prescriptions for *Pinus Caribaea* Plantations in Cuba: a Modelling Approach. *Journal of Tropical Forest Science* 22, 139-154.
- Chi, X.W., 2013. Research of carbon storage function and nitrogen storage function of metasequoia glyptostroboides and Japanese cedar in Huaxi rainy area. Master degree dissertation, Sichuan Agricultural University, Sichuan Ya'an.
- Fang, S.Z., Xu, X.Z., Tang, L.Z., 1995. Studies on the crown structure and biomass production of *Metasequoia glyptostroboides* plantations. *Chinese Journal of Applied Ecology* 6, 225-230. doi:10.13287/j.1001-9332.1995.0046 (In Chinese, with English abstract)
- Gao, Z.Z., Jiang, G.H., Xing, A.J., Yu, M.R., 1992. A study of the biomass of *Metasequoia glyptostroboides* plantation in zhebei plain. *Chinese Journal of Plant Ecology* 16, 64-71. (In Chinese, with English abstract)
- Kimmins, J.P., 1993. Scientific foundations for the simulation of ecosystem function and management in FORCYTE-11. For. Can. Northwest Reg., North. For. Cent., Inf. Rep. NOR-X-328. Edmonton.
- Kimmins, J. P., Maily, D., Seely, B., 1999. Modelling forest ecosystem net primary production: the hybrid simulation approach used in forecast.

Ecological Modelling 122, 195-224.

- Kimmins, J.P., Blanco, J.A., Seely, B., Welham, C., Scoullar, K., 2010. Forecasting Forest Futures: A Hybrid Modelling Approach to the Assessment of Sustainability of Forest Ecosystems and their Values. Earthscan Ltd.: London.
- Penman, J., Gytarsky, M., Hiraishi, T., Krug, T., Kruger, D., Pipatti, R., Buendia, L., Miwa, K., Ngara, T., Tanabe, K., Wagner, F., 2003. Good Practice Guidance for Land Use, Land-Use Change and Forestry. IPCC National Greenhouse Gas Inventories Programme and Institute for Global Environmental Strategies, Kanagawa.
- Wang, W.F., Wei, X., Liao, W.M., et al, 2013. Evaluation of the effects of forest management strategies on carbon sequestration in evergreen broad-leaved ( *Phoebe bournei* ) plantation forests using FORECAST ecosystem model. *Forest Ecology & Management* 300, 21-32.
- Wei, X., Blanco, J.A., Jiang, H., Kimmins, J.P., 2012. Effects of nitrogen deposition on carbon sequestration in Chinese fir forests. *Science of the Total Environment* 416, 351-361.
- Williams, C.J., LePage, B.A., Vann, D.R., Tange, T., Ikeda, H., Ando, M., Kusakabe, T., Tsuzuki, H., Sweda, T., 2003. Structure, allometry, and biomass of plantation *Metasequoia glyptostroboides* in Japan. *Forest Ecology and Management* 180, 287–301. doi:10.1016/S0378-1127(02)00567-4
- Xie, T.S., 2007. Comparison of the growth of *Metasequoia glyptostroboides* plantations with different ages and slopes. *Subtropical Agriculture Research* 3, 184-189. doi:10.3969/j.issn.1673-0925.2007.03.007 (In Chinese, with English abstract)
- Xiao, C.B., Wang, H., Fan, K.F., Xavier, B., Han, Y.J., Kang, H.Z., Liu, C.J., 2010. Carbon storage of *Metasequoia glyptostroboides* plantation ecosystems at different age stages in Chongming island, east China. *Journal of Shanghai Jiaotong University (Agricultural Science)* 28, 30-34. (In Chinese, with English abstract)
